# Supplementary material
Source: Elsevier journal article supplement (https://www.sciencedirect.com/science/article/pii/S1699258X21001248)
Supplement: mmc1 [file S1699258X21001248:mmc1.doc]

## **Anexo 3. Abreviaturas**

ACG: arteritis de células gigantes

ACR: Americam College of Rheumatology

AR: artritis reumatoide

AZA: azatioprina

BILAG: British Isles Lupus Assessment Group

BVAS: Birmingham Vasculitis Activity Score

CHMP: Committee for Medicinal Products for Human Use

CFM: ciclofosfamida

CMG: Concentraciones medias geométricas

CMV: citomegalovirus

DM: dermatomiositis

EA: evento adverso

EAAG: evento adverso autoinmune grave

EB: enfermedad de Behçet

ECA: ensayo clínico aleatorizado

EMA: European Medicines Agency

EMTC: enfermedad mixta del tejido conectivo

ERAS: enfermedades reumáticas autoinmunes sistémicas

ES: esclerosis sistémica

EULAR: European League Against Rheumatism

GC: glucocorticoides

HR: hazard ratio

IC: intervalo de confianza

IRR: Incidence Rate Ratio

IS: inmunosupresor

LES: lupus eritematoso sistémico

MMF: micofenolato mofetilo

MTX: metotrexato

MI: miopatías inflamatorias

NNH: número necesario para hacer daño (number needed to harm)

NNT: número necesario a tratar (number needed to treat)

OR: odds ratio

PAN: panarteritis nodosa

PCj: Pneumocystis jirovecii

PCR: proteína C reactiva

PCV7: vacuna conjugada 7-valente

PCV13: vacuna conjugada 13-valente

PPV23: vacuna no conjugada polisacárida 23-valente

RR: riesgo relativo

RS: revisión sistemática

RTX: rituximab

SER: Sociedad Española de Reumatología

SIGN: Scotish Intercollegiate Guidelines Network

SLEDAI: Systemic Lupus Erythematosus Disease Activity Index

SSp: síndrome de Sjögren primario

TMP-SMX: trimetoprim-sulfametoxazol

TNF: Tumoral Necrosis Factor

VAERS: Vaccine Adverse Event Reporting System

VHB: virus de la hepatitis B

VHC: virus de la hepatitis C

VHZ: virus del herpes zoster

VPH: virus del papiloma humano
